# Supplementary material for: Heterogeneous post-passivation of inorganic cesium lead halide perovskite quantum dots for efficient electroluminescent devices
Source: Royal Society of Chemistry journal article supplement (doi:10.1039/d0tc05856d), 2021-01-01
Supplement: d0tc05856d1.pdf [file d0tc05856d1.pdf]

## Electronic Supporting Information (ESI)

# Heterogeneous Post-Passivation of Inorganic Cesium Lead Halide Perovskite Quantum Dots for Efficient Electroluminescent Devices

Xuefei Li,<sup>abc</sup> Liuqing Yang,<sup>abc</sup> Qingqing Yang,<sup>a</sup> Shumeng Wang,<sup>\*a</sup> Junqiao Ding,<sup>\*abc</sup> Lixiang Wang<sup>ab</sup>

<sup>a</sup> *State Key Laboratory of Polymer Physics and Chemistry, Changchun Institute of Applied Chemistry, Chinese Academy of Sciences, Changchun, 130022, P. R. China.*

<sup>b</sup> *University of Science and Technology of China, Hefei 230026, P. R. China.*

<sup>c</sup> *School of Chemical Science and Technology, Yunnan University, Kunming 650091, P. R. China*

*\*Corresponding authors: [wangshumeng@ciac.ac.cn](mailto:wangshumeng@ciac.ac.cn); [dingjunqiao@ynu.edu.cn](mailto:dingjunqiao@ynu.edu.cn)*

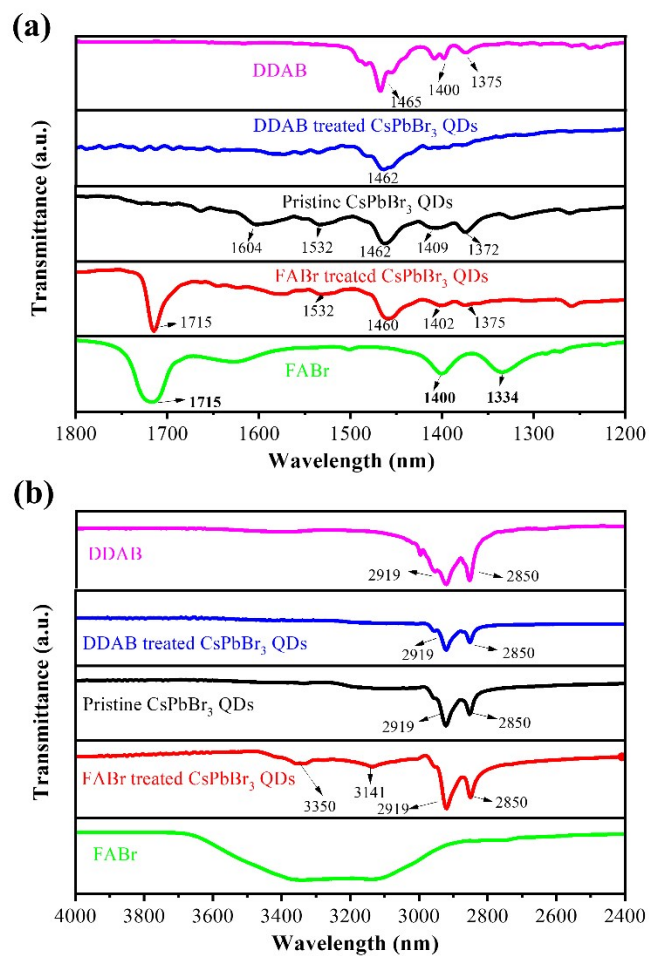

**Fig. S1** Magnified FTIR spectra of pristine QDs, FABr treated QDs, FABr ligand, DDAB treated QDs and DDAB ligand ranged from 1800 to 1200  $\text{cm}^{-1}$  (a) and from 4000 to 2400  $\text{cm}^{-1}$  (b).

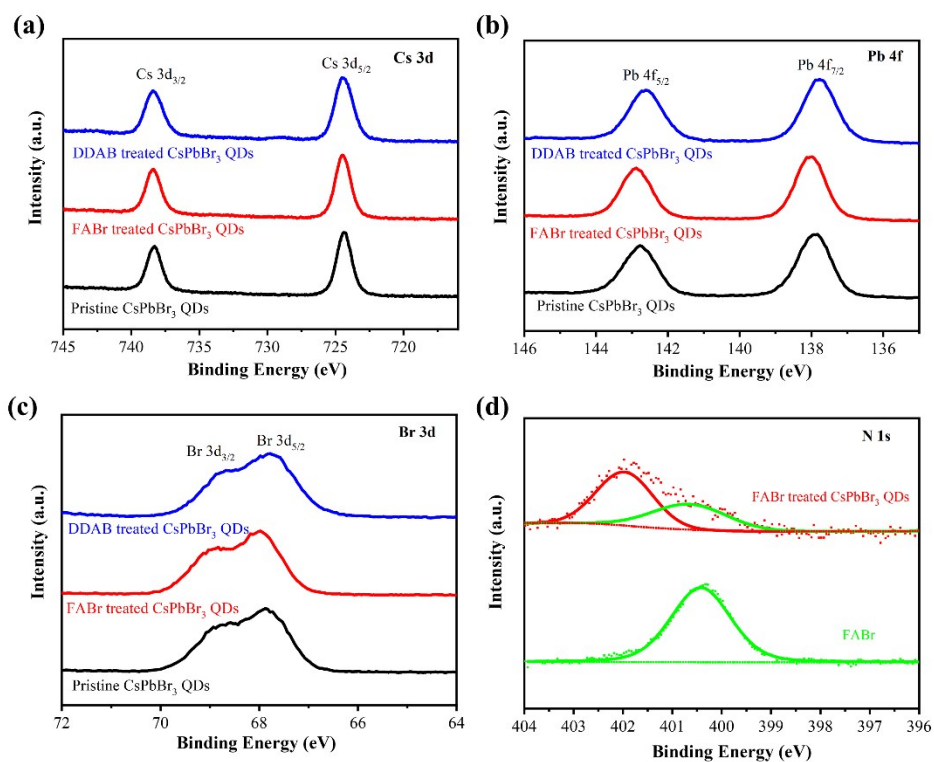

**Fig. S2** XPS spectra. (a) Cs 3d spectra, (b) Pb 4f spectra and (c) Br 3d spectra of pristine, FABr and DDAB treated CsPbBr<sub>3</sub> QDs. (d) N 1s spectra of FABr treated CsPbBr<sub>3</sub> QDs and FABr.

**Table S1.** Summary of the atom ratio of CsPbBr<sub>3</sub> QDs.

| CsPbBr <sub>3</sub> QDs | Cs:Pb:Br ratio | N:Pb ratio | O:Pb ratio |
|-------------------------|----------------|------------|------------|
| Pristine                | 1.11:1:4.01    | 0.56       | 1.90       |
| FABr treated            | 1.09:1:4.35    | 0.88       | 1.15       |
| DDAB treated            | 1.27:1:4.24    | 0.81       | 0.67       |

**Table S2** The summary of photophysical parameters of pristine, FABr treated and DDAB treated CsPbBr<sub>3</sub> QDs including solution and film state.

| CsPbBr <sub>3</sub> QDs <sup>a</sup> | $\lambda_{em}$<br>(nm) | PLQY <sup>b</sup><br>(%) | $\tau_{ave}$ <sup>c,d</sup><br>(ns) | $k_r$ <sup>d</sup><br>(10 <sup>-2</sup> ns <sup>-1</sup> ) | $k_{nr}$ <sup>d</sup><br>(10 <sup>-2</sup> ns <sup>-1</sup> ) |
|--------------------------------------|------------------------|--------------------------|-------------------------------------|------------------------------------------------------------|---------------------------------------------------------------|
| Pristine                             | 513 / 513              | 46 / 30                  | 10.3 / 16.8                         | 4.5 / 1.8                                                  | 5.2 / 4.1                                                     |
| FABr treated                         | 513 / 514              | 87 / 72                  | 13.7 / 17.7                         | 6.3 / 4.1                                                  | 1.0 / 1.5                                                     |
| DDAB treated                         | 514 / 515              | 92 / 73                  | 19.8 / 21.2                         | 4.7 / 3.4                                                  | 0.4 / 1.3                                                     |

<sup>a</sup>The data in front of “/” were measured in toluene at a concentration of 0.1 mg mL<sup>-1</sup> and the data followed “/” were measured in the films spin-coated on the quartz substrates. <sup>b</sup>Measured by using an integrating sphere and excited at 400 nm. <sup>c</sup>The lifetimes were determined by triple exponential fit of PL decay curves. <sup>d</sup>The  $\tau_{ave}$ ,  $k_r$  and  $k_{nr}$  are calculated based on the following

formulas: 
$$\tau_{ave} = \frac{\sum_{i=1}^3 a_i \tau_i^2}{\sum_{i=1}^3 a_i \tau_i} = \frac{1}{k_r + k_{nr}}, \quad k_r = \frac{PLQY}{\tau_{ave}}, \quad k_{nr} = \frac{1}{\tau_{ave}} - k_r$$
 ( $a_i$  and  $\tau_i$  are

normalized coefficients and time constants, respectively).

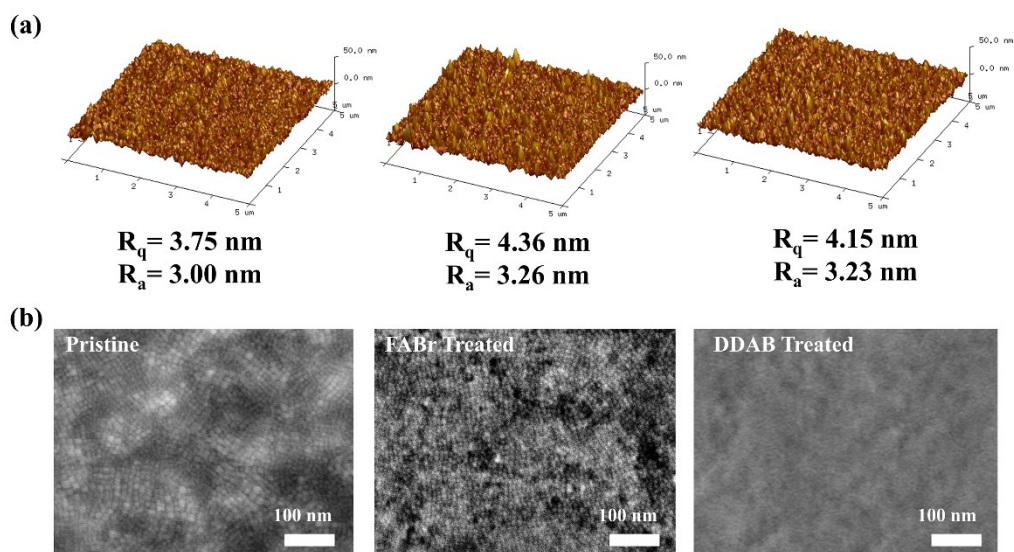

**Fig. S3** (a) AFM images of CsPbBr<sub>3</sub> QD films (from left to right: pristine, FABr treated and DDAB treated) and corresponding  $R_q$  and  $R_a$  values listed on the bottom. (b) SEM images of CsPbBr<sub>3</sub> QD films (from left to right: pristine, FABr treated, and DDAB treated).

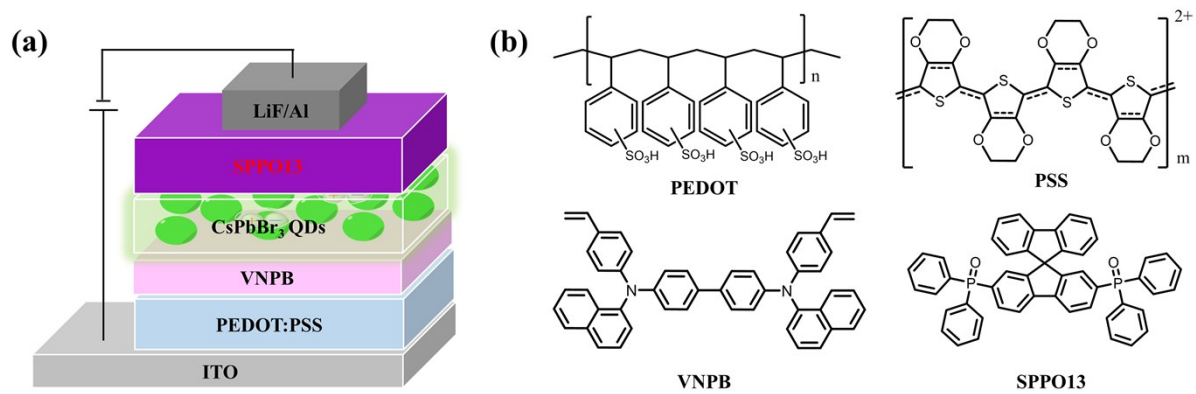

**Fig. S4** (a) The diagram of CsPbBr<sub>3</sub> PeQLEDs device configuration. (b) The molecular structure of PEDOT:PSS, VNPB and SPP013.

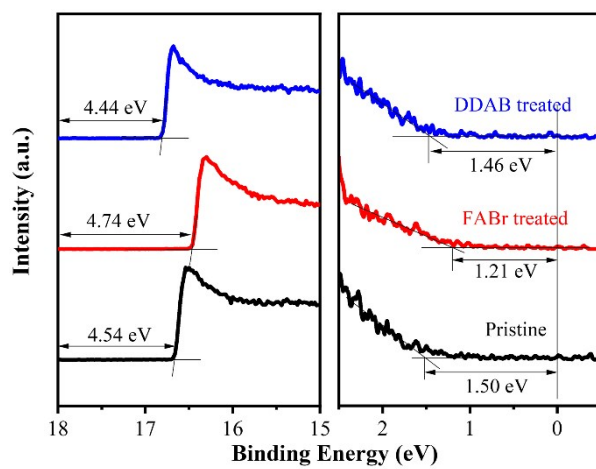

**Fig. S5** UPS spectra of pristine, FABr and DDAB treated CsPbBr<sub>3</sub> QDs including cut-off region (left) and band-edge region (right).



**Table S3** Summary of VB and CB values of CsPbBr<sub>3</sub> QDs

| CsPbBr <sub>3</sub> QDs | VB <sup>a</sup> (eV) | CB <sup>b</sup> (eV) |
|-------------------------|----------------------|----------------------|
| Pristine                | -6.04                | -3.65                |
| FABr treated            | -5.95                | -3.56                |
| DDAB treated            | -5.86                | -3.47                |

<sup>a</sup>The VB was determined by UPS spectra,  $VB = -(\hbar\nu - E_{\text{cut-off}} + E_{\text{band-edge}})$ . <sup>b</sup>The CB was determined by VB and  $E_g$  (estimated from the absorption onset),  $CB = VB + E_g$ .

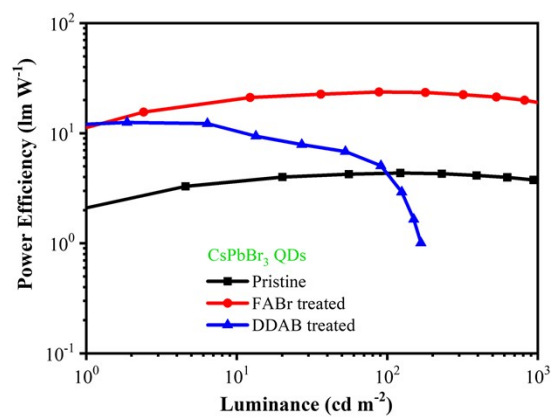

**Fig. S6** Power efficiency as a function of luminance for CsPbBr<sub>3</sub> PeQLEDs.

**Table S4** Summary of  $R_s$  and  $R_{ct}$  values of CsPbBr<sub>3</sub> PeQLEDs. The  $R_s$  and  $R_{ct}$  were calculated by fitting the impedance curves of all CsPbBr<sub>3</sub> PeQLEDs.

| CsPbBr <sub>3</sub> PeQLEDs | $R_s$ ( $\Omega$ ) | $R_{ct}$ (k $\Omega$ ) |
|-----------------------------|--------------------|------------------------|
| Pristine                    | 39.89              | 8.97                   |
| FABr treated                | 58.19              | 4.58                   |
| DDAB treated                | 64.21              | 22.76                  |

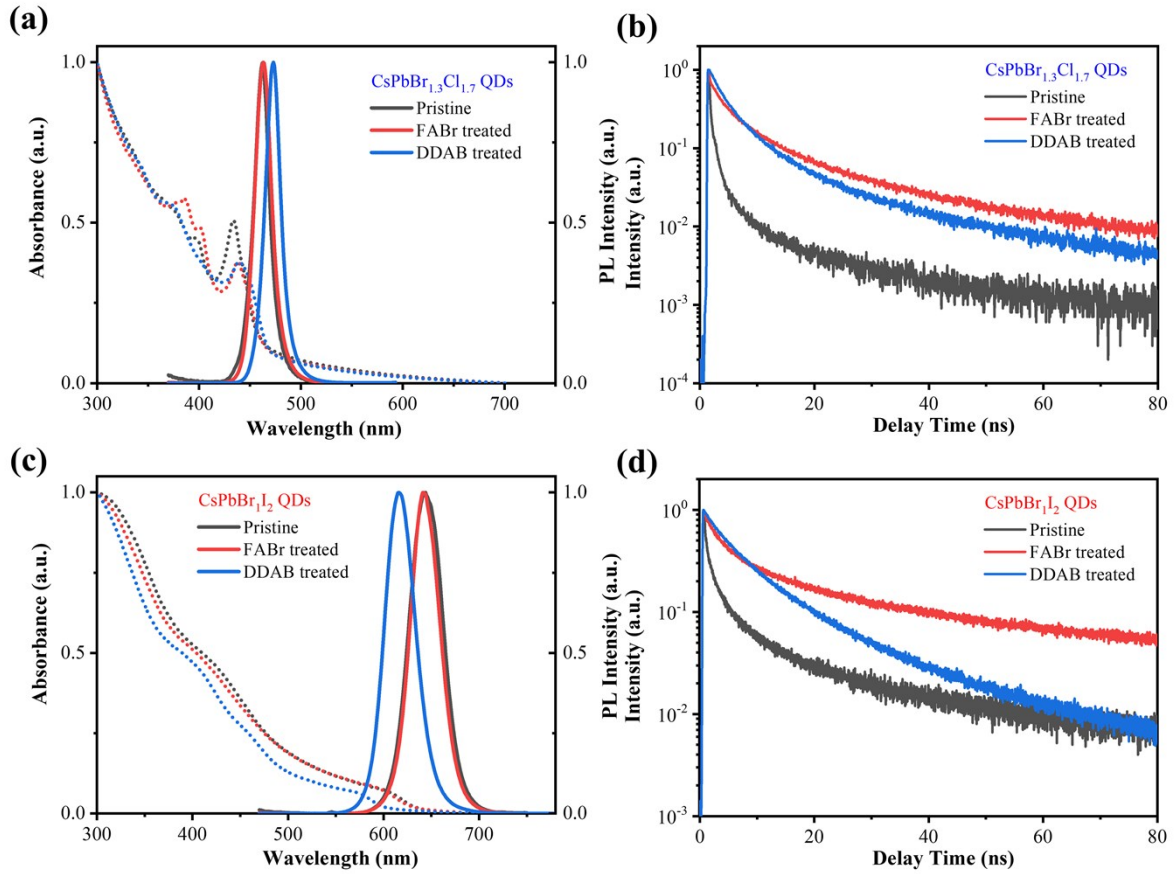

**Fig. S7** (a) Absorption and PL spectra of pristine, FABr treated and DDAB treated CsPbBr<sub>1.3</sub>Cl<sub>1.7</sub> QD films (dash line: absorption spectra; solid line: PL spectra). (b) The time-resolved PL decay spectra of pristine, FABr treated and DDAB treated CsPbBr<sub>1.3</sub>Cl<sub>1.7</sub> QD films. (c) Absorption and PL spectra of pristine, FABr treated and DDAB treated CsPbBr<sub>1</sub>I<sub>2</sub> QD films (dash line: absorption spectra; solid line: PL spectra). (d) The time-resolved PL decay spectra of pristine, FABr treated and DDAB treated CsPbBr<sub>1</sub>I<sub>2</sub> QD films.

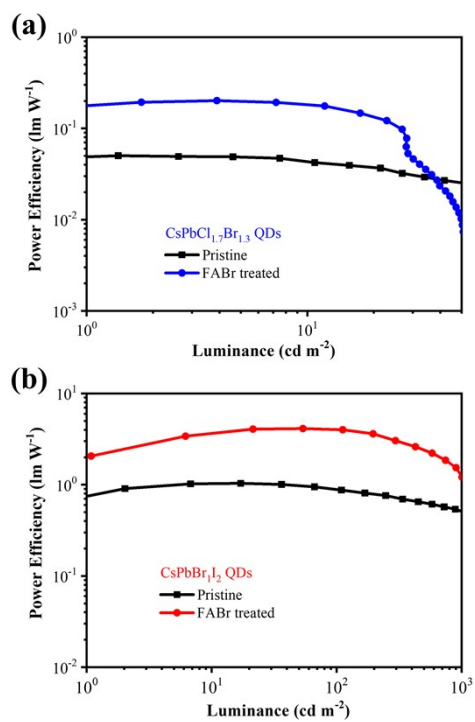

**Fig. S8** Power efficiency as a function of luminance for CsPbBr<sub>1.3</sub>Cl<sub>1.7</sub> and CsPbBr<sub>1.2</sub> PeQLEDs.
